# Supplementary material
Source: PubMed Central journal article supplement (PMC4512553)
Supplement: supp_115.176834_FigureS3.pdf [file supp_115.176834_FigureS3.pdf]

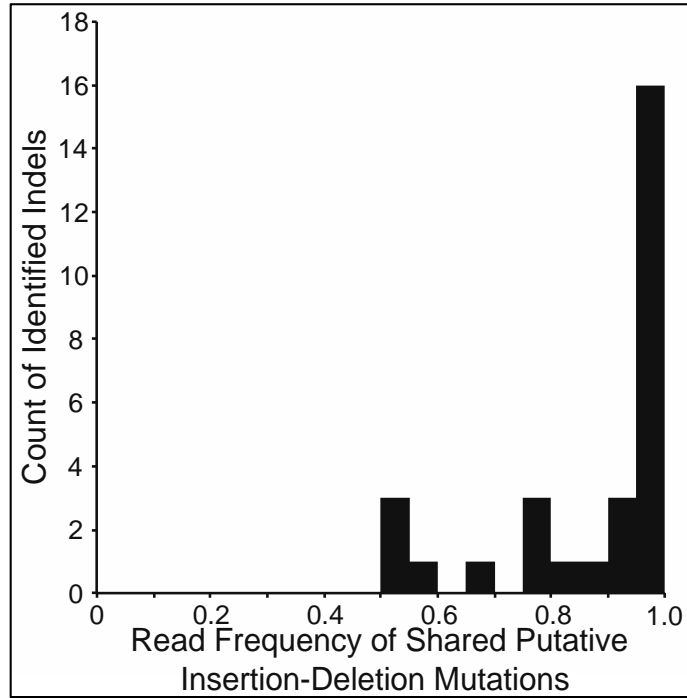

**Figure S3** Distribution of the full-coverage read frequencies leading to the identification of each insertion-deletion mutation (indel) in this study. Full-coverage read frequency is the number of reads with >25 bases on each side of the indel mutation that supported the call, divided by the total reads with >25 bases on each side of the indel.
