# Supplementary material
Source: PubMed Central journal article supplement (PMC4512553)
Supplement: supp_115.176834_FigureS4.pdf [file supp_115.176834_FigureS4.pdf]

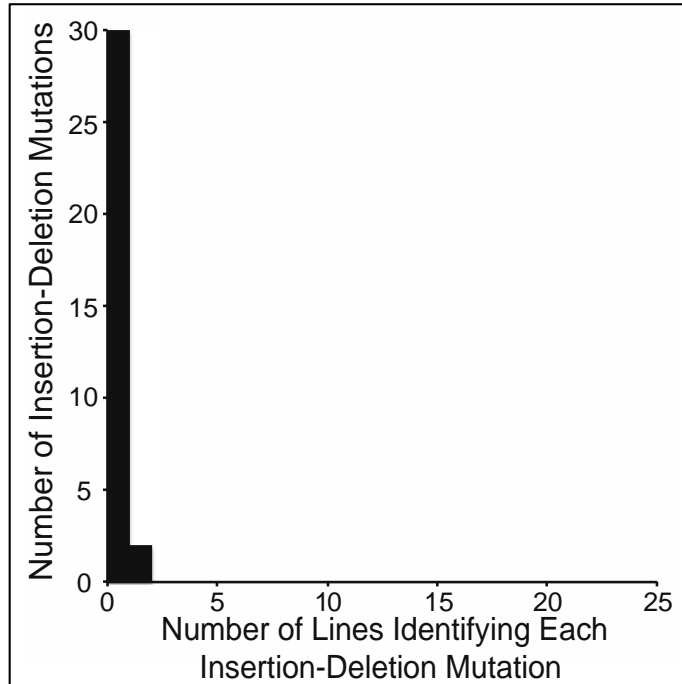

**Figure S4** Distribution of the number of MA lines that identified each insertion-deletion mutation (location, size, and motif) called in this study.
