# Supplementary material
Source: PubMed Central journal article supplement (PMC4512553)
Supplement: supp_115.176834_FigureS5.pdf [file supp_115.176834_FigureS5.pdf]

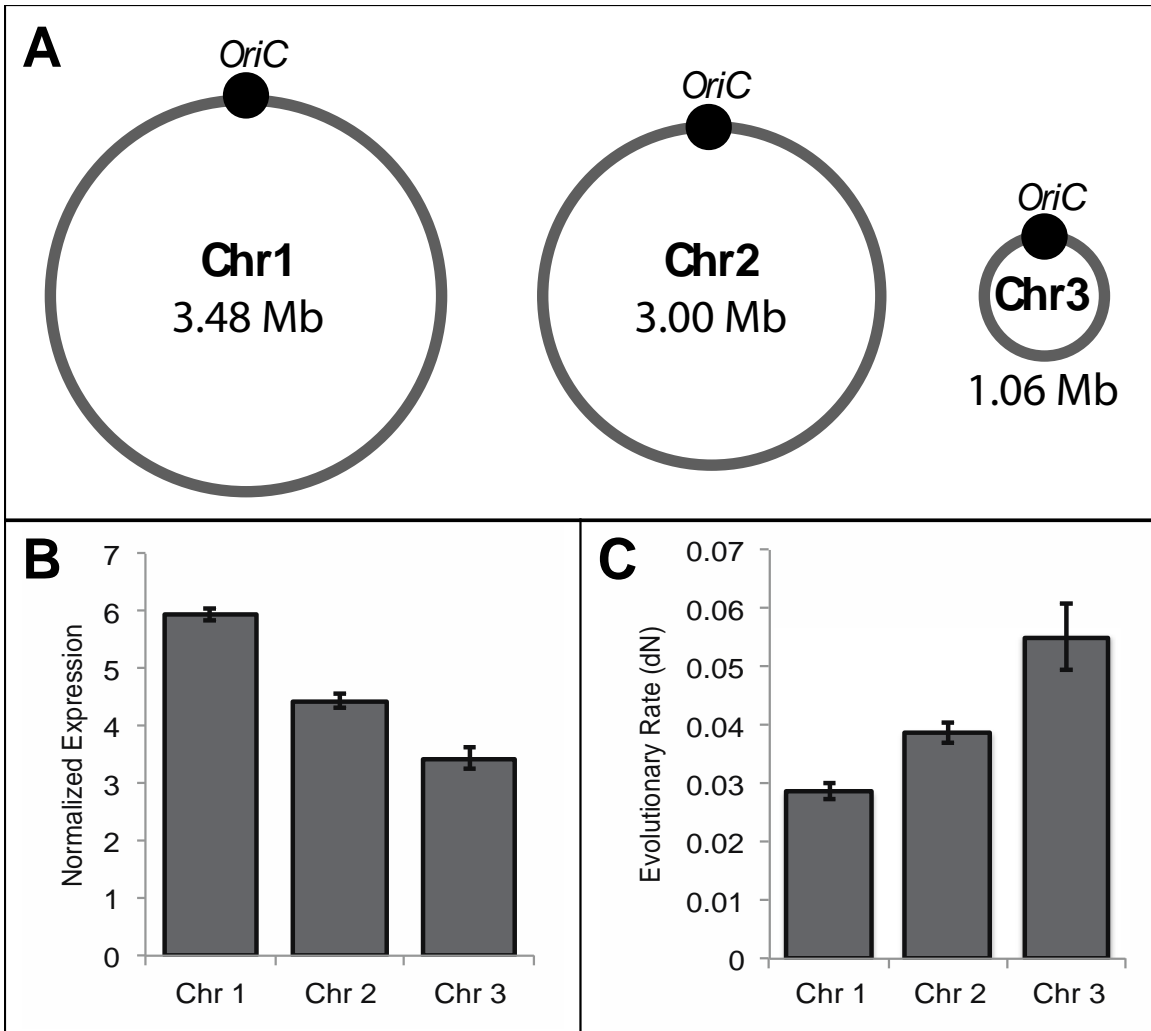

**Figure S5** Chromosome size and expression (derived from RNAseq as described in (Gout *et al.* 2013)) decline from chromosome 1 (chr1) to chromosome 3 (chr3) (A,B), while evolutionary rate is lowest on chr1 and highest on chr3 (C) (MORROW and COOPER 2012).
