# Supplementary material
Source: PubMed Central journal article supplement (PMC4512553)
Supplement: supp_115.176834_FigureS6.pdf [file supp_115.176834_FigureS6.pdf]

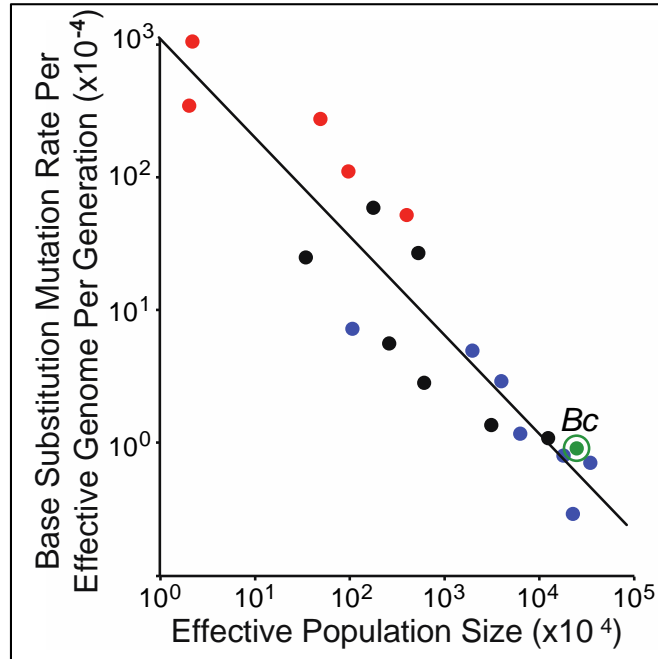

**Figure S6** Relationship between base substitution mutation rate per effective genome size per generation and effective population size ( $N_e$ ) in five multicellular eukaryotes (red), seven unicellular eukaryotes (black), and eight prokaryotes (blue; *B. cenocepacia* – green) (SUNG *et al.* 2012). The log-linear regression is highly significant ( $r^2=0.85$ ,  $p<0.0001$ ,  $df=19$ ).
