# Supplementary material
Source: PubMed Central journal article supplement (PMC4512553)
Supplement: supp_115.176834_FigureS8.pdf [file supp_115.176834_FigureS8.pdf]

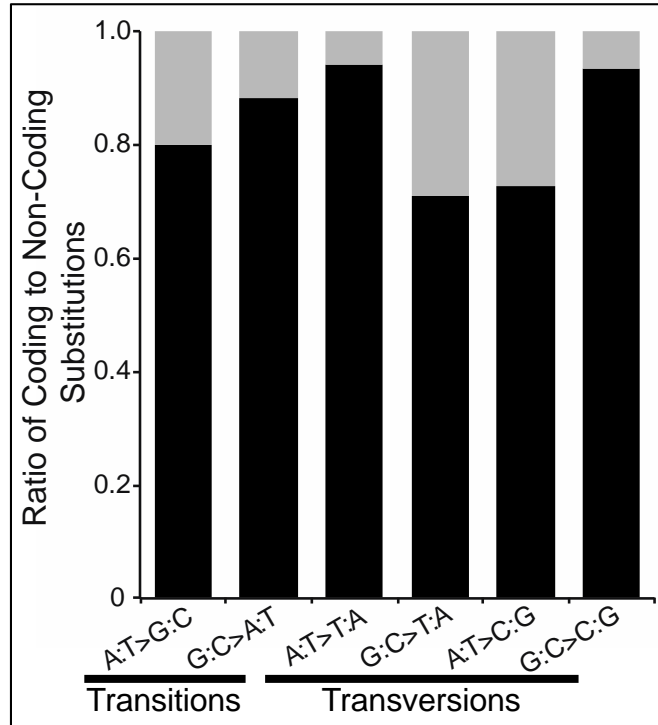

**Figure S8** The ratio of coding (Black) to non-coding (Grey) substitutions for each *B. cenocepacia* substitution type.
